# Supplementary material
Source: Springer Nature journal article supplement (https://www.springermedizin.de/resource/supplementary/12939_2011_217_MOESM1_ESM.pdf/9550624)
Supplement: MOESM1 [file 9550624]

Ministry of Health and Medical Education

University of Medical Sciences at the province

District Health Centers

Primary Health Care Network

Rural Health Centers

Rural Health Houses
